# Supplementary material
Source: MDPI journal article supplement (https://www.mdpi.com/2073-4352/13/12/1676)
Supplement: s1 [file s1]

## Supplementary Material

# Self-assembly and the conformational change in the oligomeric structure of the ectodomain of TBEV E protein studied by XRD, SAXS and molecular dynamics.

## Supplementary Figures

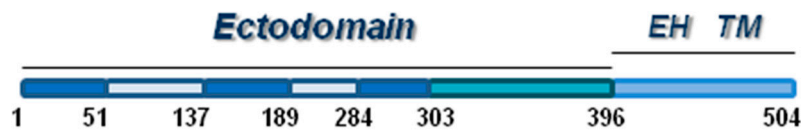

**Figure S1.** Scheme of protein E organization. Domain I (regions 1-51, 137-189, 285-302), domain II (regions 52-136, 190-284) and domain III (regions 303-396) of an ectodomain colored dark blue, light grey and teal respectively. Stem (EH) and transmembrane (TM) helices (region 397-504) colored blue. Residue numbering is shown as linear peptide.

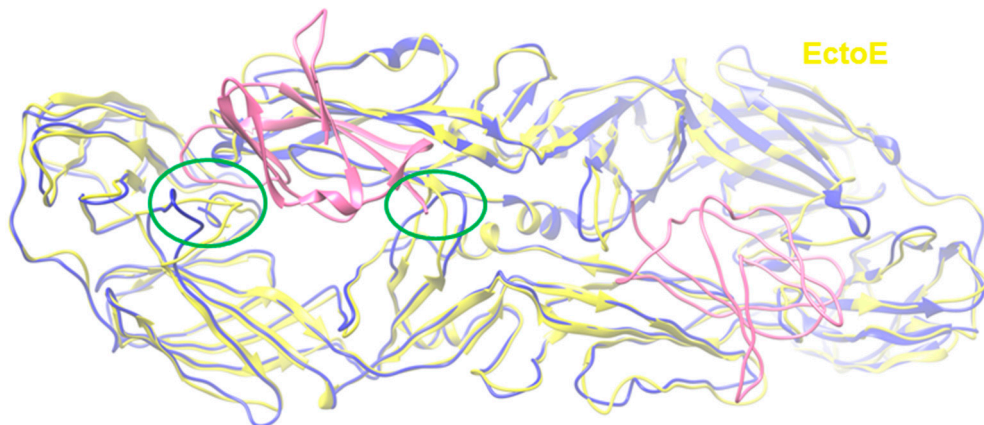

**Figure S2.** Superposition of ectoE (yellow) and 7QRE (protein E colored blue, pr protein colored pink) structures. Difference in Cα-trace of ectoE and E protein of Neudorfl strain due to protein pr binding (7QRE) is highlighted by green ovals.

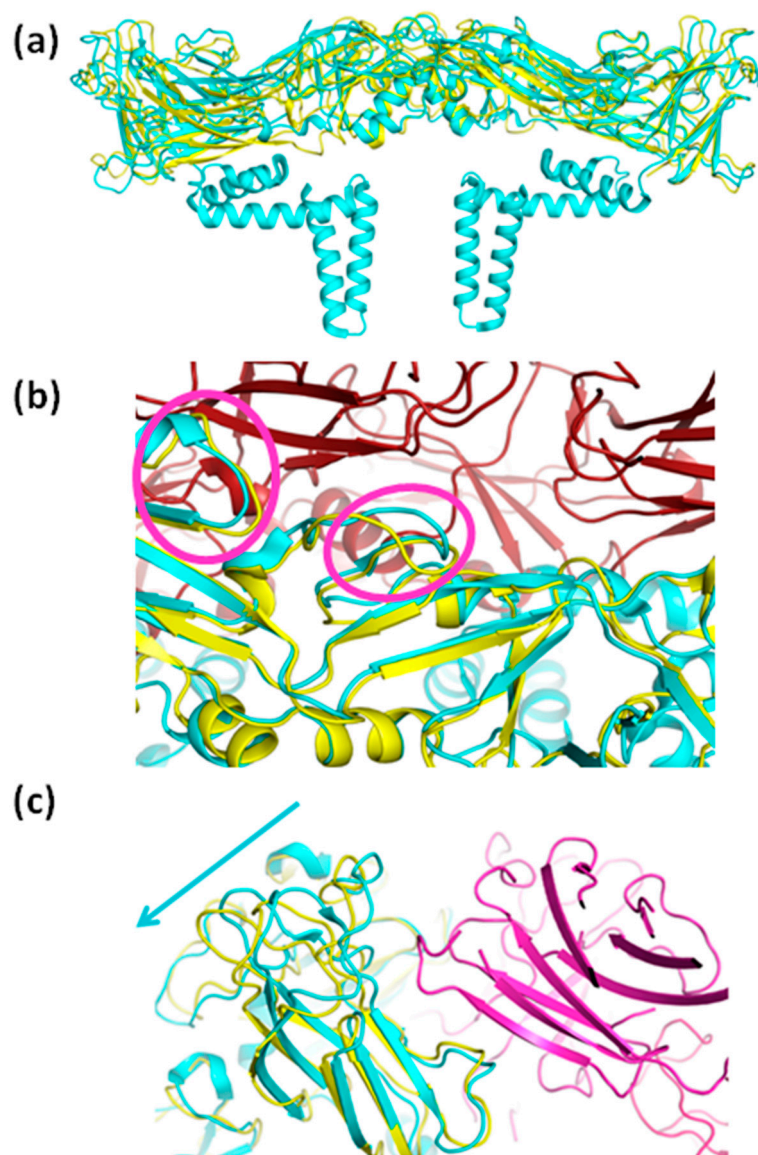

**Figure S3.** Influence of crystal packing on ectoE dimer conformation. (a) Superposition of ectoE (colored yellow) dimer from crystal structure (from CCT tetramer) and dimer from asymmetric part of cryo-EM structure of Kauutsalo-14 strain (colored cyan). (b) Zoom of region 79-90 (highlighted by pink oval) and 229-237 (highlighted by pink oval) of ectoE (colored yellow) superimposed with protein E in asymmetric part of structure of Kauutsalo-14 strain (colored cyan). Other dimer of CCT is colored brown. (c) Superposition of ectoE dimer of ECT (colored yellow) with dimer from asymmetric part of cryo-EM structure of Kauutsalo-14 strain (colored cyan). Other dimer of ECT colored magenta. Concerted movement of regions 300-312, 346-356 and 360-372 of domain III of ectoE due to neighbor subunit position in ECT is shown by blue arrow.
